# Supplementary material for: Annexin-A1 enhances breast cancer growth and migration by promoting alternative macrophage polarization in the tumour microenvironment
Source: PubMed Central journal article supplement (PMC5738423; doi:10.1038/s41598-017-17622-5), 2017-12-20
Supplement: 41598_2017_17622_MOESM1_ESM.pdf [file 41598_2017_17622_MOESM1_ESM.pdf]

# **Annexin-A1 enhances breast cancer growth and migration by promoting alternative macrophage polarization in the tumour microenvironment**

Leonardo A. Moraes, Shreya Kar, Foo Sok Lin, Tong Gu, Yi Qian Toh, Patrick B Ampomah, Karishma Sachaphibulkij, Gracemary Yap, Olga Zharkova, Hakim M. Lukman, Anna-Marie Fairhurst, Alan Prem Kumar, Lina HK Lim

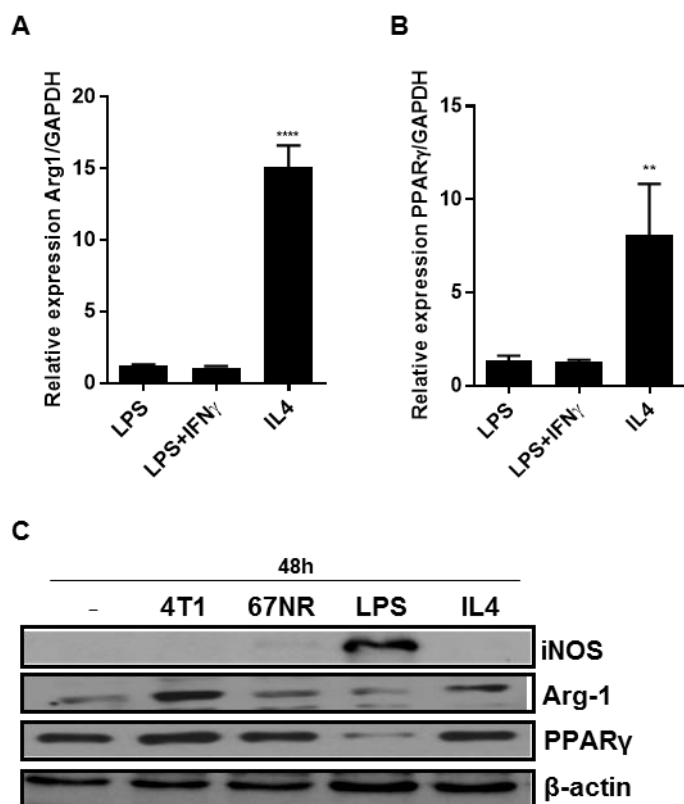

**Figure 1 – 4T1 and 67NR-conditioned media effects on macrophage polarization.** Phenotype for distinct macrophages were determined by mRNA expression of (A) Arg1 and (B) PPAR $\gamma$  after treatment with IL4 (20 ng ml<sup>-1</sup>), LPS (10 ng ml<sup>-1</sup>) or LPS (10 ng ml<sup>-1</sup>) + IFN $\gamma$  (10 ng ml<sup>-1</sup>). Data represents relative gene expression after normalization with GAPDH by RT-qPCR ( $\Delta\Delta$ Ct method). (C) Protein expression of Arg1, PPAR $\gamma$  and iNOS were determined after treatment with 4T1 and 67NR-conditioned media, LPS (10 ng ml<sup>-1</sup>) or IL4 (20 ng ml<sup>-1</sup>) for 48h. Immunoblots are representatives of 3 experiments. Data shown are mean  $\pm$ SD (n=4). \*\*P $\leq$ 0.01, \*\*\*\*P $\leq$ 0.001, ANOVA.

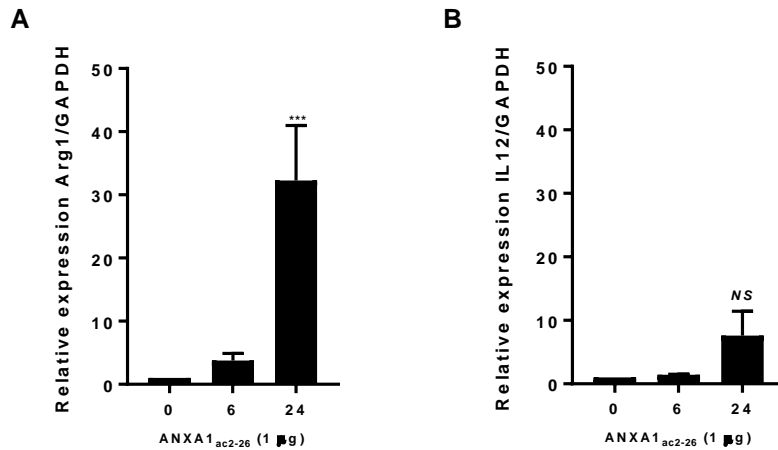

**Figure 2 – ANX1 plays a role on macrophage polarization.** RAW 264.7 macrophages were treated with ANXA1 peptide ac2-26 (1 µg mL<sup>-1</sup>) and phenotype for distinct macrophages were determined by mRNA expression of the primary classically M1 (IL12) and activated M2 (Arg1) markers. Results are expressed in mRNA levels after normalization with GAPDH by RT-qPCR ( $\Delta\Delta C_t$  method). Data shown are mean  $\pm$  SD (n=4). \*\*\*P $\leq$ 0.01, ANOVA.

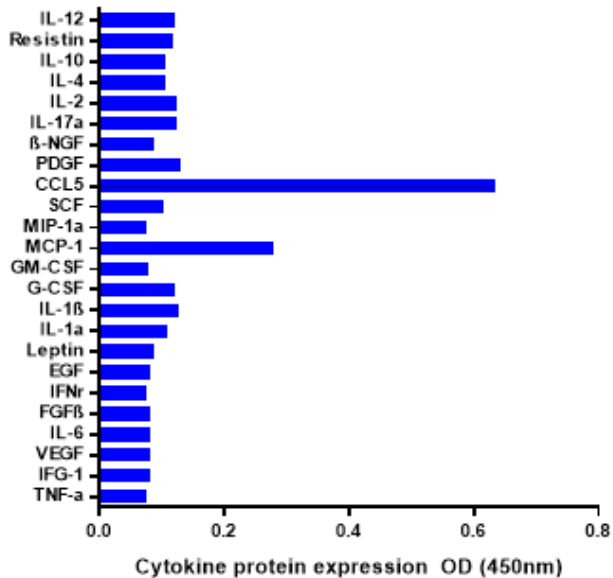

**Figure 3 – Cytokine protein array derived from 4T1-breast carcinoma cells.** 4T1 cells were cultured in RPMI for 48h and culture supernatants were collected and cytokine was measured by optical density transmission (OD).

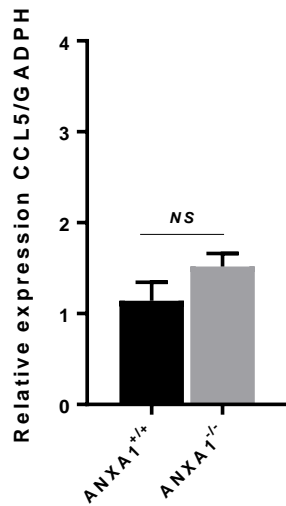

**Figure 4 – Characterization of ANXA1-deficient macrophages.** BMDM were isolated from WT and ANXA1<sup>-/-</sup> mice and chemokine CCL5 expression was quantified by RT-qPCR. Results are expressed in mRNA levels after normalization with GAPDH (A). Data shown are mean ±SD (n=3). NS (no significant, *t*-test).
